# Supplementary material for: Re-assessment of net energy production and greenhouse gas emissions avoidance after 40 years of photovoltaics development
Source: PubMed Central journal article supplement (PMC5150644; doi:10.1038/ncomms13728), 2016-12-06
Supplement: ncomms13728-s1.pdf [file ncomms13728-s1.pdf]

## SUPPLEMENTARY TABLES

Supplementary Table 1. Data for cumulative energy demand and energy payback time of multicrystalline silicon solar cells, modules and systems. Energy payback time was calculated from CED with a harmonised procedure, assuming an insolation of  $1700 \text{ kWhm}^{-2}\text{yr}^{-1}$  and a performance ratio of 0.75. Studies that did not present results for full systems, or that present results for worst case or best case scenarios, as well as prospective studies were excluded from our analysis.

| Reference | Data Year | Cumulative Energy Demand ( $\text{MJ}_p \text{ W}_p^{-1}$ ) |         |         | EPBT (years) |         |         | Excluded | Prospective |
|-----------|-----------|-------------------------------------------------------------|---------|---------|--------------|---------|---------|----------|-------------|
|           |           | Cells                                                       | Modules | Systems | Cells        | Modules | Systems |          |             |
| [1]       | 1976      | 246                                                         |         |         | 16.7         |         |         | •        |             |
| [1]       | 1976      | 510                                                         |         |         | 34.6         |         |         | •        |             |
| [2]       | 1977      | 93.6                                                        | 96.1    |         | 6.34         | 6.51    |         | •        |             |
| [3]       | 1977      |                                                             | 270     | 637     |              | 18.3    | 43.1    | •        |             |
| [4]       | 1985      | 166                                                         |         |         | 11.3         |         |         | •        |             |
| [5]       | 1989      |                                                             | 59.4    | 72.0    |              | 4.02    | 4.88    |          |             |
| [6]       | 1993      | 60.6                                                        | 63.2    | 68.4    | 4.10         | 4.28    | 4.63    |          |             |
| [7]       | 1996      | 24.3                                                        | 33.0    |         | 1.65         | 2.24    |         | •        |             |
| [5]       | 1997      |                                                             | 27.0    | 32.4    |              | 1.83    | 2.20    | •        | •           |
| [8]       | 1997      | 23.9                                                        | 30.5    |         | 1.62         | 2.06    |         | •        |             |
| [8]       | 1997      | 22.5                                                        | 28.9    |         | 1.52         | 1.96    |         | •        |             |
| [8]       | 1997      | 10.7                                                        | 14.4    |         | 0.73         | 0.98    |         | •        | •           |
| [9]       | 1997      | 70.3                                                        | 93.1    |         | 4.76         | 6.31    |         | •        |             |
| [9]       | 1997      | 24.1                                                        | 36.2    |         | 1.63         | 2.45    |         | •        |             |
| [10]      | 1998      |                                                             | 36.8    |         |              | 2.49    |         | •        |             |
| [9]       | 1999      | 25.7                                                        | 36.2    |         | 1.74         | 2.45    |         | •        |             |
| [11]      | 1999      | 29.6                                                        | 36.2    | 57.9    | 2.01         | 2.45    | 3.92    |          |             |
| [11]      | 1999      | 26.9                                                        | 35.4    | 41.8    | 1.82         | 2.40    | 2.83    |          |             |
| [12]      | 2003      |                                                             | 34.0    |         |              | 2.30    |         | •        |             |
| [13]      | 2005      | 22.0                                                        | 29.8    | 32.5    | 1.49         | 2.02    | 2.20    |          |             |
| [14]      | 2006      |                                                             |         | 32.5    |              |         | 2.20    |          |             |
| [15]      | 2005      |                                                             | 25.6    | 35.3    |              | 1.73    | 2.39    |          |             |
| [16]      | 1999      | 43.1                                                        | 48.1    | 53.2    | 2.92         | 3.26    | 3.60    |          |             |
| [17]      | 2006      |                                                             | 16.9    | 32.5    |              | 1.14    | 2.21    |          |             |
| [18]      | 1999      |                                                             |         | 49.2    |              |         | 3.34    |          |             |
| [15]      | 2007      |                                                             | 69.4    | 78.6    |              | 4.70    | 5.33    | •        |             |
| [15]      | 2007      |                                                             | 25.3    | 34.4    |              | 1.71    | 2.33    |          |             |
| [19]      | 2008      |                                                             |         | 33.1    |              |         | 2.24    |          |             |
| [20]      | 2008      |                                                             | 16.0    | 31.3    |              | 1.08    | 2.12    |          |             |
| [21]      | 2009      |                                                             |         | 23.5    |              |         | 1.59    |          |             |
| [22]      | 2009      |                                                             | 19.7    | 23.9    |              | 1.33    | 1.62    |          |             |
| [11]      | 2010      |                                                             | 17.3    | 21.6    |              | 1.17    | 1.46    | •        | •           |
| [23]      | 2011      | 6.25                                                        | 14.8    | 15.8    | 0.42         | 1.00    | 1.07    |          |             |
| [23]      | 2011      | 6.17                                                        | 17.9    | 18.9    | 0.42         | 1.21    | 1.28    |          |             |
| [24]      | 2013      | 3.71                                                        | 7.82    | 13.7    | 0.25         | 0.530   | 0.930   |          |             |
| [11]      | 2020      |                                                             | 12.9    | 16.7    |              | 0.877   | 1.13    | •        | •           |

Supplementary Table 2. Data for cumulative energy demand and energy payback time of mono-crystalline silicon solar cells, modules and systems. Energy payback time was calculated from CED with a harmonised procedure, assuming an insolation of  $1700 \text{ kWhm}^2\text{yr}^{-1}$  and a performance ratio of 0.75. Studies that did not present results for full systems, or that present results for worst case or best case scenarios, as well as prospective studies were excluded from our analysis.

| Reference | Data Year | Cumulative Energy Demand ( $\text{MJp W}_p^{-1}$ ) |         |         | EPBT (years) |         |         | Excluded | Prospective |
|-----------|-----------|----------------------------------------------------|---------|---------|--------------|---------|---------|----------|-------------|
|           |           | Cells                                              | Modules | Systems | Cells        | Modules | Systems |          |             |
| [5]       | 1989      |                                                    | 63.0    | 73.8    |              | 4.32    | 5.06    |          |             |
| [6]       | 1993      | 57.4                                               | 59.6    | 63.3    | 3.94         | 4.09    | 4.34    |          |             |
| [25]      | 1995      |                                                    | 63.1    |         |              | 4.33    |         | •        |             |
| [25]      | 1995      |                                                    | 11.3    |         |              | 0.779   |         | •        |             |
| [5]       | 1997      |                                                    | 39.6    | 43.9    |              | 2.72    | 3.01    | •        | •           |
| [26]      | 1997      |                                                    |         | 63.2    |              |         | 4.34    |          |             |
| [8]       | 1997      | 123                                                | 127     |         | 8.45         | 8.73    |         | •        |             |
| [8]       | 1997      | 91.5                                               | 95.7    |         | 6.28         | 6.57    |         | •        |             |
| [8]       | 1997      | 29.9                                               | 34.1    |         | 2.05         | 2.34    |         | •        | •           |
| [9]       | 1997      | 44.5                                               | 49.6    | 53.5    | 3.05         | 3.40    |         | •        |             |
| [9]       | 1997      | 107                                                | 116     | 123     | 7.32         | 7.93    |         | •        |             |
| [10]      | 1998      |                                                    | 63.7    |         |              | 4.37    |         | •        |             |
| [27]      | 1999      | 52.2                                               | 64.0    |         | 3.58         | 4.39    |         | •        |             |
| [11]      | 1999      |                                                    | 44.3    | 58.1    |              | 3.04    | 3.99    |          |             |
| [11]      | 1999      |                                                    | 44.3    | 50.3    |              | 3.04    | 3.45    |          |             |
| [28]      | 2003      |                                                    | 31.9    | 45.2    |              | 2.19    | 3.10    |          |             |
| [28]      | 2003      |                                                    | 31.9    | 56.0    |              | 2.19    | 3.84    |          |             |
| [14]      | 2005      |                                                    |         | 39.8    |              |         | 2.70    |          |             |
| [29]      | 2005      | 37.8                                               | 41.3    |         | 2.59         | 2.83    |         | •        |             |
| [18]      | 1999      |                                                    |         | 56.4    |              |         | 3.87    |          |             |
| [30]      | 2006      |                                                    | 37.1    | 39.8    |              | 2.55    | 2.73    |          |             |
| [19]      | 2008      |                                                    |         | 41.9    |              |         | 2.88    |          |             |
| [21]      | 2009      |                                                    |         | 23.3    |              |         | 1.60    |          |             |
| [22]      | 2009      |                                                    | 27.9    | 32.0    |              | 1.91    | 2.20    |          |             |
| [11]      | 2010      |                                                    | 40.7    | 44.9    |              | 2.79    | 3.08    | •        | •           |
| [11]      | 2010      |                                                    | 38.0    | 42.2    |              | 2.61    | 2.90    | •        | •           |
| [23]      | 2011      | 13.4                                               | 25.3    | 26.2    | 0.92         | 1.74    | 1.80    |          |             |
| [23]      | 2011      | 13.2                                               | 30.8    | 31.7    | 0.90         | 2.11    | 2.18    |          |             |
| [31]      | 2012      | 16.3                                               | 21.2    | 29.2    | 1.12         | 1.45    | 2.00    |          |             |
| [24]      | 2013      | 5.15                                               | 10.0    | 16.1    | 0.35         | 0.684   | 1.10    |          |             |
| [11]      | 2020      |                                                    | 33.5    | 37.0    |              | 2.30    | 2.54    | •        | •           |
| [11]      | 2020      |                                                    | 33.5    | 37.0    |              | 2.30    | 2.54    | •        | •           |
| [31]      | 2020      | 6.87                                               | 10.3    | 17.1    | 0.47         | 0.708   | 1.17    | •        | •           |
| [32]      | 2020      |                                                    | 9.23    |         |              | 0.633   |         | •        | •           |
| [32]      | 2020      |                                                    | 7.14    |         |              | 0.490   |         | •        | •           |
| [32]      | 2020      |                                                    | 7.00    |         |              | 0.480   |         | •        | •           |

Supplementary Table 3. Data for life cycle greenhouse gas emissions of multi-crystalline silicon PV systems. Harmonised system GHG was calculated from the reported values assuming an insolation of  $1700 \text{ kWhm}^{-2}\text{yr}^{-1}$ , a performance ratio of 0.75, a lifetime of 30 years and a degradation rate of 0.7% per year. Studies that did not present results for full systems, or that present results for worst case or best case scenarios, as well as prospective studies were excluded from our analysis.

| Reference | Data Year | Reported GHG (gCO <sub>2</sub> -eq/kWh) |         |      |        | Harmonised system GHG      |                            | Excluded | Prospective |
|-----------|-----------|-----------------------------------------|---------|------|--------|----------------------------|----------------------------|----------|-------------|
|           |           | Cells                                   | Modules | BOS  | System | (gCO <sub>2</sub> -eq/kWh) | (kgCO <sub>2</sub> -eq/Wp) |          |             |
| [5]       | 1989      |                                         |         |      | 245    | 143                        | 4.90                       |          |             |
| [5]       | 1989      |                                         |         |      | 123    | 143                        | 4.90                       |          |             |
| [33]      | 1991      |                                         |         |      | 188    | 94.9                       | 3.25                       |          |             |
| [25]      | 1995      |                                         |         |      | 305    | 178                        | 6.10                       | •        |             |
| [25]      | 1995      |                                         |         |      | 245    | 143                        | 4.90                       | •        |             |
| [25]      | 1995      |                                         |         |      | 179    | 178                        | 6.09                       | •        |             |
| [25]      | 1995      |                                         |         |      | 144    | 143                        | 4.90                       | •        |             |
| [34]      | 1993      | 42.9                                    | 55.4    | 58.3 | 114    | 118                        | 4.04                       |          |             |
| [34]      | 1993      | 58.8                                    | 76.0    | 67.6 | 144    | 109                        | 3.72                       |          |             |
| [34]      | 1993      | 57.5                                    | 73.1    | 59.0 | 132    | 137                        | 4.69                       |          |             |
| [9]       | 1997      |                                         |         |      | 60.0   | 67.0                       | 2.30                       |          |             |
| [9]       | 1997      |                                         |         |      | 150    | 168                        | 5.74                       |          |             |
| [35]      | 1992      |                                         |         |      | 189    | 142                        | 4.88                       |          |             |
| [8]       | 1998      |                                         |         |      | 73.3   | 49.5                       | 1.70                       | •        |             |
| [8]       | 1998      |                                         |         |      | 66.0   | 44.6                       | 1.53                       | •        |             |
| [36]      | 1998      |                                         |         |      | 87.0   | 87.0                       | 2.98                       |          |             |
| [11]      | 1999      |                                         |         |      | 60.0   | 67.0                       | 2.30                       |          |             |
| [16]      | 1996      |                                         |         |      |        | 138.2                      | 4.73                       | •        |             |
| [14]      | 2005      |                                         |         |      | 36.4   | 40.7                       | 1.39                       |          |             |
| [30]      | 2006      |                                         |         |      | 35.0   | 39.1                       | 1.34                       |          |             |
| [15]      | 2005      |                                         | 52.0    | 20.0 | 72.0   | 53.6                       | 1.84                       |          |             |
| [37]      | 2005      |                                         |         |      | 53.0   | 61.0                       | 2.09                       |          |             |
| [38]      | 2007      |                                         |         |      | 29.5   | 29.5                       | 1.01                       |          |             |
| [11]      | 2010      |                                         |         |      | 30.0   | 33.5                       | 1.15                       | •        | •           |
| [23]      | 2011      | 14.0                                    | 21.7    | 5.5  | 27.2   | 27.7                       | 0.95                       |          |             |
| [23]      | 2011      | 35.5                                    | 43.6    | 5.5  | 49.1   | 50.0                       | 1.71                       | •        |             |
| [24]      | 2013      |                                         |         |      | 28.0   | 19.0                       | 0.65                       |          |             |
| [24]      | 2013      |                                         |         |      | 26.0   | 18.5                       | 0.63                       |          |             |
| [24]      | 2013      |                                         |         |      | 21.0   | 20.4                       | 0.70                       |          |             |
| [24]      | 2013      |                                         |         |      | 18.0   | 18.7                       | 0.64                       |          |             |
| [11]      | 2020      |                                         |         |      | 20.0   | 22.3                       | 0.77                       | •        | •           |

Supplementary Table 4. Data for life cycle greenhouse gas emission of mono-crystalline silicon PV systems. Harmonised system GHG was calculated from the reported values assuming an insolation of  $1700 \text{ kWhm}^{-2}\text{yr}^{-1}$ , a performance ratio of 0.75, a lifetime of 30 years and a degradation rate of 0.7% per year. Studies that did not present results for full systems, or that present results for worst case or best case scenarios, as well as prospective studies were excluded from our analysis.

| Reference | Data Year | Reported GHG (gCO <sub>2</sub> -eq/kWh) |         |     |        | Harmonised system GHG    |                          | Excluded | Prospective |
|-----------|-----------|-----------------------------------------|---------|-----|--------|--------------------------|--------------------------|----------|-------------|
|           |           | Cells                                   | Modules | BOS | System | gCO <sub>2</sub> -eq/kWh | kgCO <sub>2</sub> -eq/Wp |          |             |
| [3]       | 1983      |                                         | 123     |     | 289    | 409                      | 14.0                     |          |             |
| [3]       | 1986      |                                         |         |     | 43     | 60                       | 2.1                      |          |             |
| [3]       | 1986      |                                         |         |     | 39     | 56                       | 1.9                      |          | •           |
| [39]      | 1992      |                                         |         |     | 334    | 225                      | 7.7                      |          |             |
| [39]      | 1992      |                                         |         |     | 238    | 161                      | 5.5                      |          |             |
| [39]      | 1992      |                                         |         |     | 77     | 52                       | 1.8                      | •        | •           |
| [35]      | 1992      |                                         |         |     | 189    | 142                      | 4.9                      |          |             |
| [8]       | 1998      |                                         |         |     | 304    | 206                      | 7.0                      |          |             |
| [8]       | 1998      |                                         |         |     | 224    | 151                      | 5.2                      |          |             |
| [14]      | 2005      |                                         |         |     | 45     | 50                       | 1.7                      |          |             |
| [30]      | 2006      |                                         |         |     | 45     | 50                       | 1.7                      |          |             |
| [20]      | 2008      |                                         |         |     | 44     | 61                       | 2.1                      |          |             |
| [20]      | 2008      |                                         |         |     | 34     | 48                       | 1.6                      |          |             |
| [38]      | 2008      |                                         |         |     | 30     | 30                       | 1.0                      |          |             |
| [23]      | 2011      | 26                                      | 33      | 5   | 38     | 41                       | 1.4                      |          |             |
| [23]      | 2011      | 69                                      | 76      | 5   | 81     | 88                       | 3.0                      | •        |             |
| [31]      | 2012      |                                         |         |     | 38     | 42                       | 1.5                      |          |             |
| [24]      | 2013      |                                         |         |     | 36     | 24                       | 0.8                      |          |             |
| [24]      | 2013      |                                         |         |     | 33     | 23                       | 0.8                      |          |             |
| [24]      | 2013      |                                         |         |     | 26     | 25                       | 0.9                      |          |             |
| [24]      | 2013      |                                         |         |     | 24     | 24                       | 0.8                      |          |             |
| [31]      | 2020      |                                         |         |     | 25     | 28                       | 1.0                      | •        | •           |

## SUPPLEMENTARY METHODS

### Data filtering

Data filtering was performed on the data gathered from the LCA studies cited in Supplementary Tables 1-5, to exclude studies that in our opinion do not reflect the state of PV production corresponding with the reported data ages. In order to maximise the available datapoints, we however only exclude those results that:

- Are specifically mentioned to be valid for worst case or best case scenarios
- Are specifically mentioned to refer to prospective studies
- Are not for complete PV systems, but only for parts (e.g. only cells or modules).

SUPPLEMENTARY REFERENCES

---

- [1] Hunt, L. P. Total energy use in the production of silicon solar cells from raw materials to finished product. In *12th Photovoltaic Specialists Conference*, 347–352 (IEEE, 1976).
- [2] Lindmayer, J. Solar breeder: Energy payback time for silicon photovoltaic systems. Report No. SX/111/10, (Solarex Corp, 1977).
- [3] Kreith, F., Norton, P. & Brown, D. A comparison of CO<sub>2</sub> emissions from fossil and solar power plants in the United States. *Energy* **15**, 1181–1198 (1990).
- [4] Aulich, H. A., Schulze, F. W. & Strake, B. Energy pay-back time for crystalline silicon photovoltaic modules using new technologies. In *IEEE Photovoltaic Specialists Conference*, 18, 1213–1218 (IEEE, 1985).
- [5] Schaefer, H. & Hagedorn, G. Hidden energy and correlated environmental characteristics of PV power generation. *Renewable Energy* **2**, 159–166 (1992).
- [6] Wetzel, T., Baake, E. & Mühlbauer, A. Energy requirements and ways of saving energy in the production process of photovoltaic modules. *International Journal of Solar Energy* **20**, 185–196 (2000).
- [7] Alsema, E. A. *Environmental aspects of solar cell modules: summary report*. Report No. 96074 (Dept. of Science, Technology and Society, Utrecht University, 1996).
- [8] Kato, K., Murata, A. & Sakuta, K. Energy pay-back time and life-cycle CO<sub>2</sub> emission of residential PV power system with silicon PV module. *Progress in Photovoltaics: Research and Applications* **6**, 105–115 (1998).
- [9] Alsema, E. A., Frankl, P. & Kato, K. Energy pay-back time of photovoltaic energy systems: Present status and prospects. In *2nd World Conference on Photovoltaic Solar Energy Conversion, Vienna*, 6–10 (1998).
- [10] Krauter, S. & Rüther, R. Considerations for the calculation of greenhouse gas reduction by photovoltaic solar energy. *Renewable Energy* **29**, 345–355 (2004).
- [11] Alsema, E. A. Energy pay-back time and CO<sub>2</sub> emissions of PV systems. *Progress in photovoltaics: research and applications* **8**, 17–25 (2000).
- [12] Meijer, A., Huijbregts, M. A. J., Schermer, J. J. & Reijnders, L. Life-cycle assessment of photovoltaic modules: Comparison of mc-Si, InGaP and InGaP/mc-Si solar modules. *Progress in Photovoltaics: Research and Applications* **11**, 275–287 (2003).
- [13] Alsema, E. & de Wild, M. J. Environmental impact of crystalline silicon photovoltaic module production. In *MRS Proceedings*, vol. 895, 0895–G03 (Cambridge Univ Press, 2005).
- [14] Fthenakis, V. & Alsema, E. Photovoltaics energy payback times, greenhouse gas emissions and external costs: 2004–early 2005 status. *Progress in Photovoltaics: Research and Applications* **14**, 275–280 (2006).
- [15] Raugei, M., Bargigli, S. & Ulgiati, S. Life cycle assessment and energy pay-back time of advanced photovoltaic modules: CdTe and CIS compared to poly-Si. *Energy* **32**, 1310–1318 (2007).
- [16] Battisti, R. & Corrado, A. Evaluation of technical improvements of photovoltaic systems through life cycle assessment methodology. *Energy* **30**, 952–967 (2005).
- [17] Koroneos, C., Stylos, N. & Moussiopoulos, N. LCA of Multicrystalline Silicon Photovoltaic Systems - Part 1: Present Situation and Future Perspectives (8 pp). *The International Journal of Life Cycle Assessment* **11**, 129–136 (2006).
- [18] Bankier, C. & Gale, S. *Energy Payback of Roof Mounted Photovoltaic Cells* <http://www.resilience.org/stories/2006-06-16/energy-payback-roof-mounted-photovoltaic-cells> (2006).
- [19] Ito, M., Komoto, K. & Kurokawa, K. Life-cycle analyses of very-large scale PV systems using six types of PV modules. *Current Applied Physics* **10**, S271–S273 (2010).
- [20] Ito, M., Kato, K., Komoto, K., Kichimi, T. & Kurokawa, K. A comparative study on cost and life-cycle analysis for 100 MW very large-scale PV (VLS-PV) systems in deserts using m-Si, a-Si, CdTe, and CIS modules. *Progress in Photovoltaics: Research and Applications* **16**, 17–30 (2008).
- [21] Raugei, M., Fullana-i Palmer, P. & Fthenakis, V. M. The energy return on energy investment (EROI) of photovoltaics: Methodology and comparisons with fossil fuel life cycles. *Energy Policy* **45**, 576–582 (2012).
- [22] Ito, M., Kudo, M., Nagura, M. & Kurokawa, K. A comparative study on life cycle analysis of 20 different PV modules installed at the Hokuto mega-solar plant. *Progress in Photovoltaics: Research and Applications* **19**, 878–886 (2011).
- [23] de Wild-Scholten, M. J. Energy payback time and carbon footprint of commercial photovoltaic systems. *Solar Energy Materials and Solar Cells* **119**, 296–305 (2013).
- [24] Wetzel, T. & Borchers, S. Update of energy payback time and greenhouse gas emission data for crystalline silicon photovoltaic modules: Broader perspectives. *Progress in Photovoltaics: Research and Applications* (In press) (2014).
- [25] Bates, J., Watkiss, P. & Thorpe, T. *Life cycle emissions from renewable energy technologies*. Report No. XA9846090 (ETSU, 1997).
- [26] Gürzenich, D., Mathur, J., Bansal, N. K. & Wagner, H.-J. Cumulative energy demand for selected renewable energy technologies. *The International Journal of Life Cycle Assessment* **4**, 143–149 (1999).
- [27] Knapp, K. & Jester, T. An empirical perspective on the energy payback time for photovoltaic modules. In *Proceedings of the Solar 2000 Conference*, 641–648 (American Solar Energy Society; American Institute of Architects, 2000).
- [28] Nawaz, I. & Tiwari, G. Embodied energy analysis of photovoltaic (PV) system based on macro- and micro-level. *Energy Policy* **34**, 3144–3152 (2006).
- [29] Boyd, S. & Dornfeld, D. A. *Technology choices for the PV Industry: A comparative life cycle assessment*. <https://escholarship.org/uc/item/9fh0w31m> (Laboratory for Manufacturing and Sustainability, UC Berkely, 2005).

- 60 [30] Alsema, E. A., de Wild-Scholten, M. J. & Fthenakis, V. M. Environmental impacts of PV electricity generation—a critical comparison of energy supply options. In *21st European Photovoltaic Solar Energy Conference, Dresden, Germany*, vol. 3201 (WIP-Munich, 2006).
- [31] Louwen, A., van Sark, W., Schropp, R., Turkenburg, W. & Faaij, A. Life-cycle greenhouse gas emissions and energy payback time of current and prospective silicon heterojunction solar cell designs. *Progress in Photovoltaics: Research and Applications* **23**, 1406–1428 (2015).
- 65 [32] Mann, S. A., de Wild-Scholten, M. J., Fthenakis, V. M., van Sark, W. G. & Sinke, W. C. The energy payback time of advanced crystalline silicon PV modules in 2020: A prospective study. *Progress in Photovoltaics: Research and Applications* **22**, 1180–1194 (2014).
- [33] Yamada, K., Komiyama, H., Kato, K. & Inaba, A. Evaluation of photovoltaic energy systems in terms of economics, energy and CO<sub>2</sub> emissions. *Energy conversion and management* **36**, 819–822 (1995).
- 70 [34] Komiyama, H., Yamada, K., Inaba, A. & Kato, K. Life cycle analysis of solar cell systems as a means to reduce atmospheric carbon dioxide emissions. *Energy conversion and management* **37**, 1247–1252 (1996).
- [35] Dones, R. & Frischknecht, R. Life-cycle assessment of photovoltaic systems: Results of Swiss studies on energy chains. *Progress in Photovoltaics Research and Applications* **6**, 117–125 (1998).
- [36] Alsema, E. A. & Nieuwlaar, E. Energy viability of photovoltaic systems. *Energy policy* **28**, 999–1010 (2000).
- [37] Hondo, H. Life cycle GHG emission analysis of power generation systems: Japanese case. *Energy* **30**, 2042–2056 (2005).
- 75 [38] Fthenakis, V. M., Kim, H. C., Held, M., Raugei, M. & Krones, J. Update of PV energy payback times and life-cycle greenhouse gas emissions. In *24th European Photovoltaic Solar Energy Conference and Exhibition*, 21–25 (WIP-Munich, 2009).
- [39] Kato, K., Murata, A. & Sakuta, K. An evaluation on the life cycle of photovoltaic energy system considering production energy of off-grade silicon. *Solar Energy Materials and Solar Cells* **47**, 95–100 (1997).
